# Supplementary material
Source: MDPI journal article supplement (https://www.mdpi.com/2227-9717/8/9/1195)
Supplement: s1 [file s1]

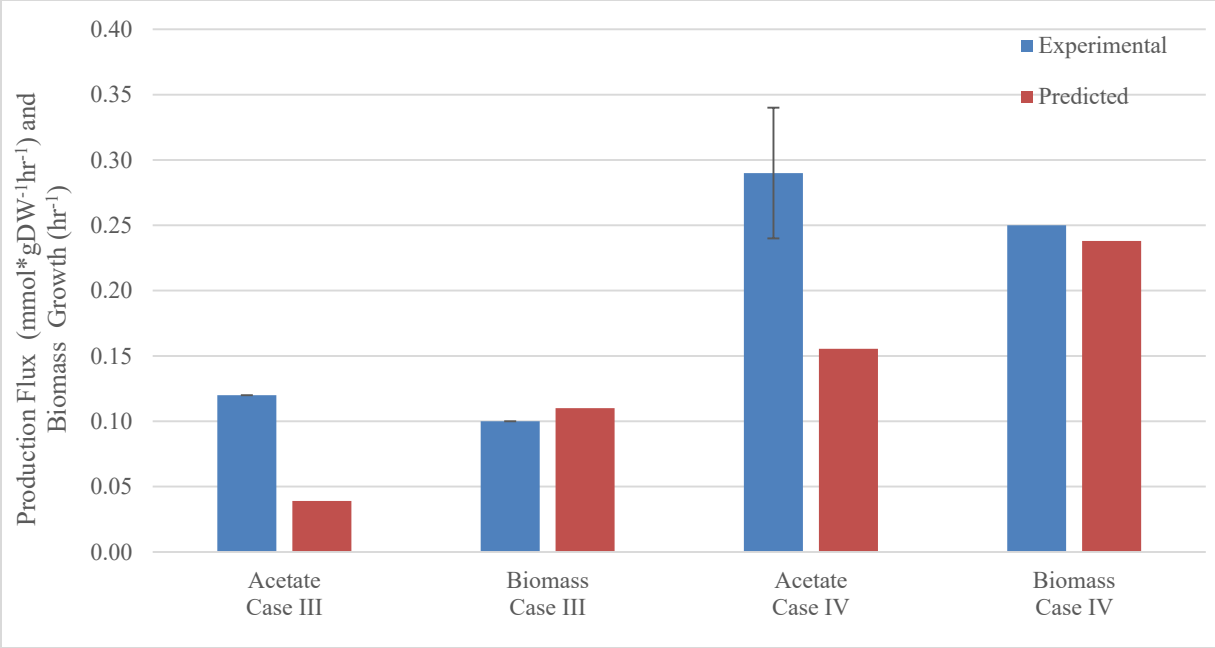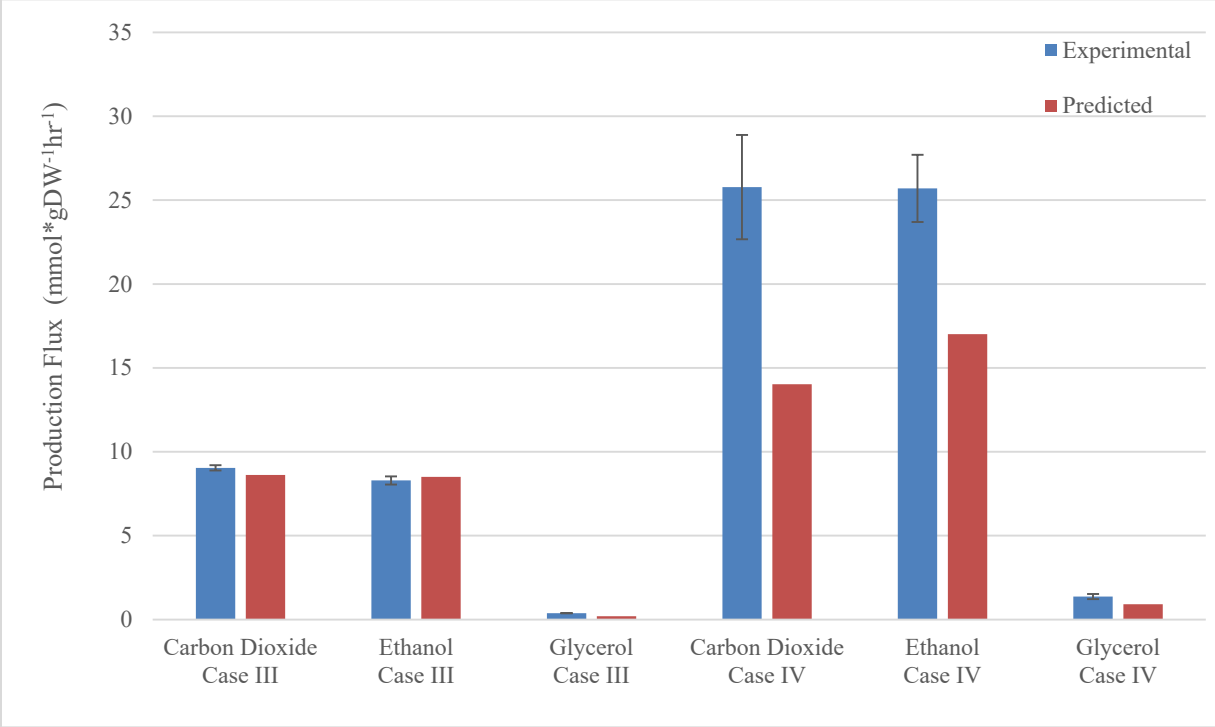

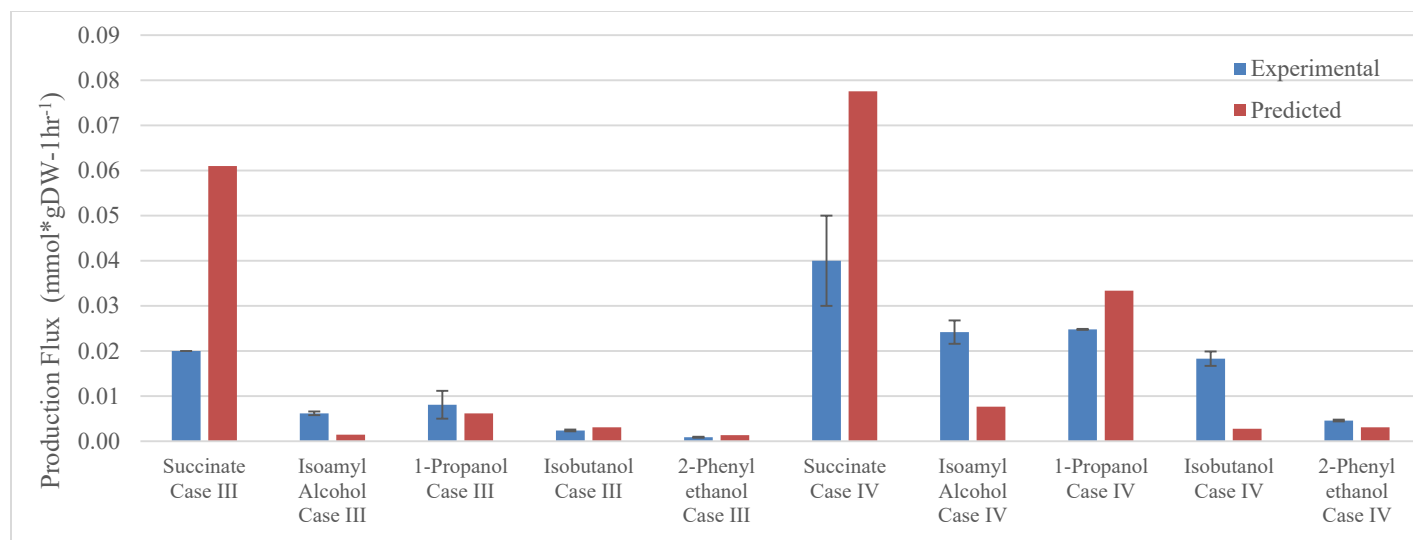

Figure S1. Comparison of GSMM simulations (Red bars) with experimental data [30] (Blue bars). Model predicted and experimental values for biomass growth rates, primary metabolite production fluxes, and secondary metabolite production fluxes represent conditions for Case III and Case IV. Experimental data are shown with standard deviation error bars.
