# Supplementary material
Source: MDPI journal article supplement (https://www.mdpi.com/2227-9717/8/9/1195)
Supplement: s1 [file s1]

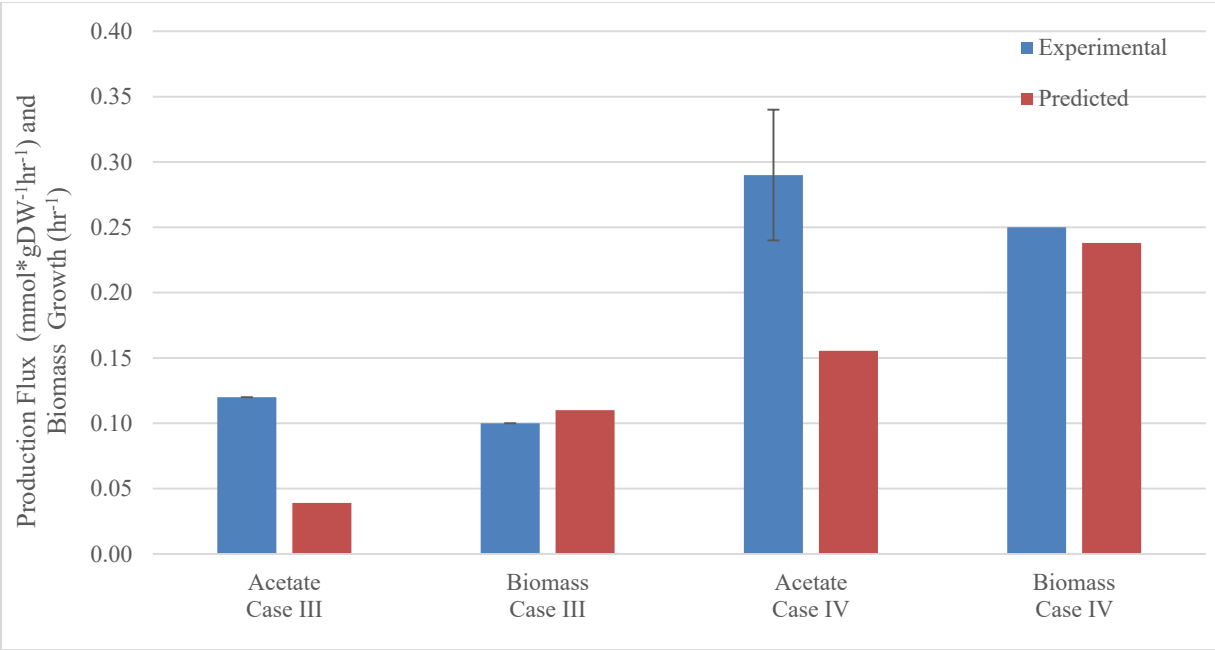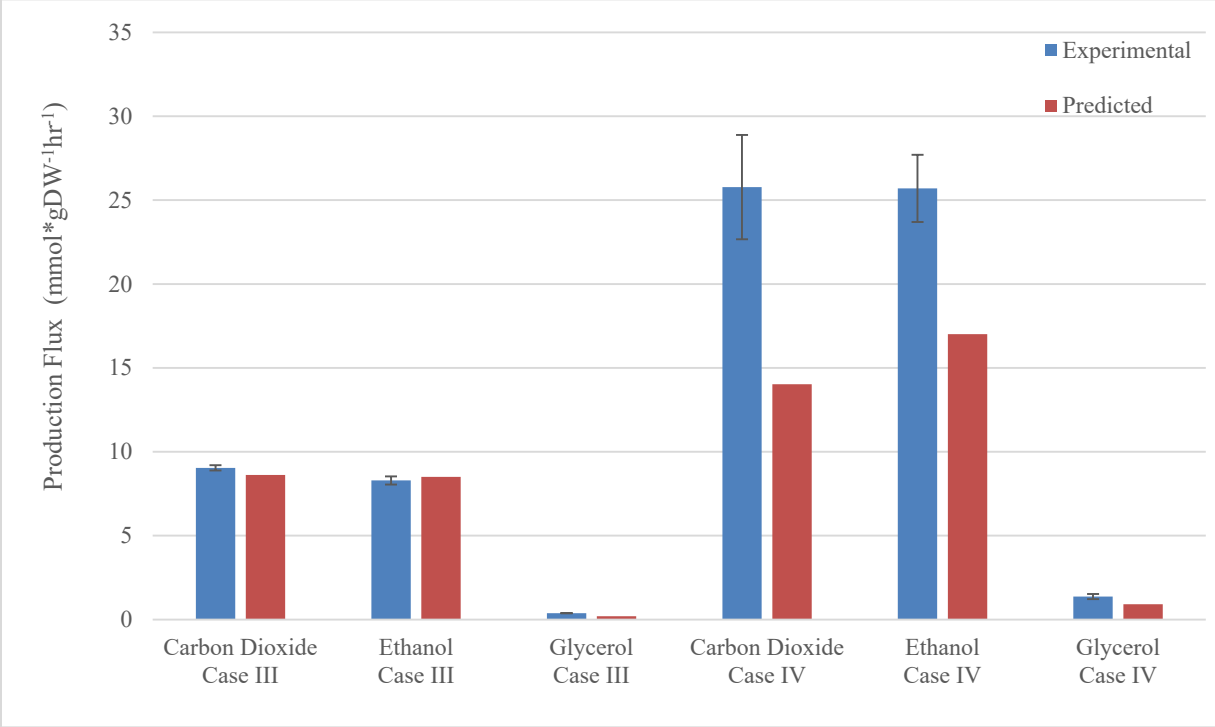

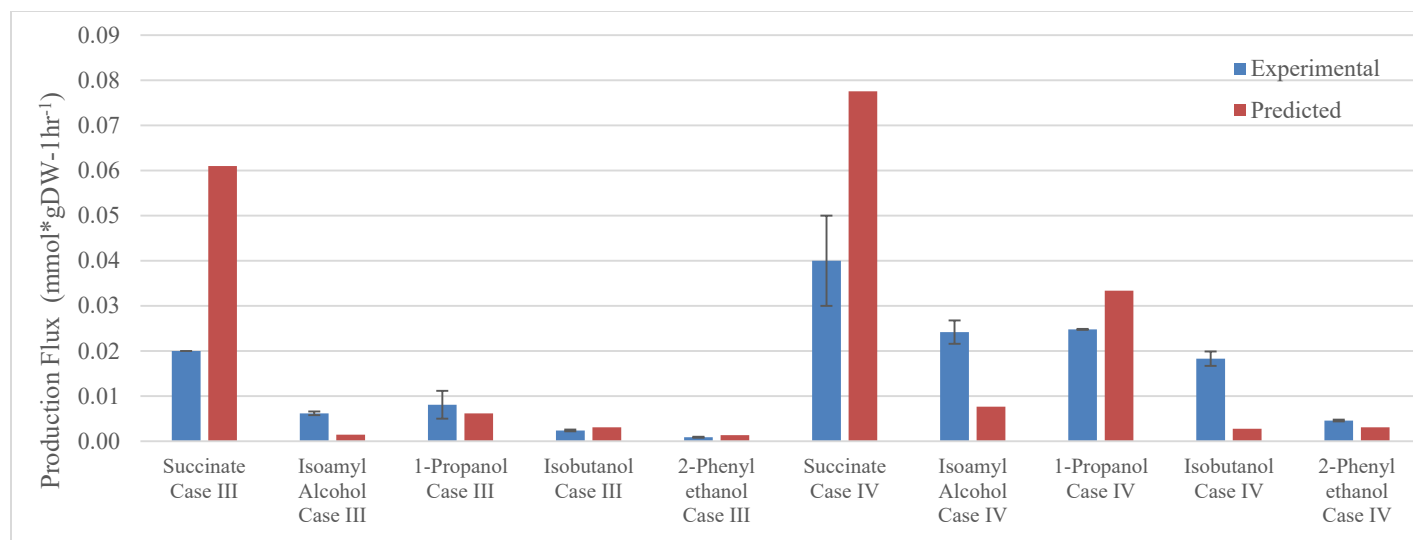

Figure S1. Comparison of GSMM simulations (Red bars) with experimental data [30] (Blue bars). Model predicted and experimental values for biomass growth rates, primary metabolite production fluxes, and secondary metabolite production fluxes represent conditions for Case III and Case IV. Experimental data are shown with standard deviation error bars.

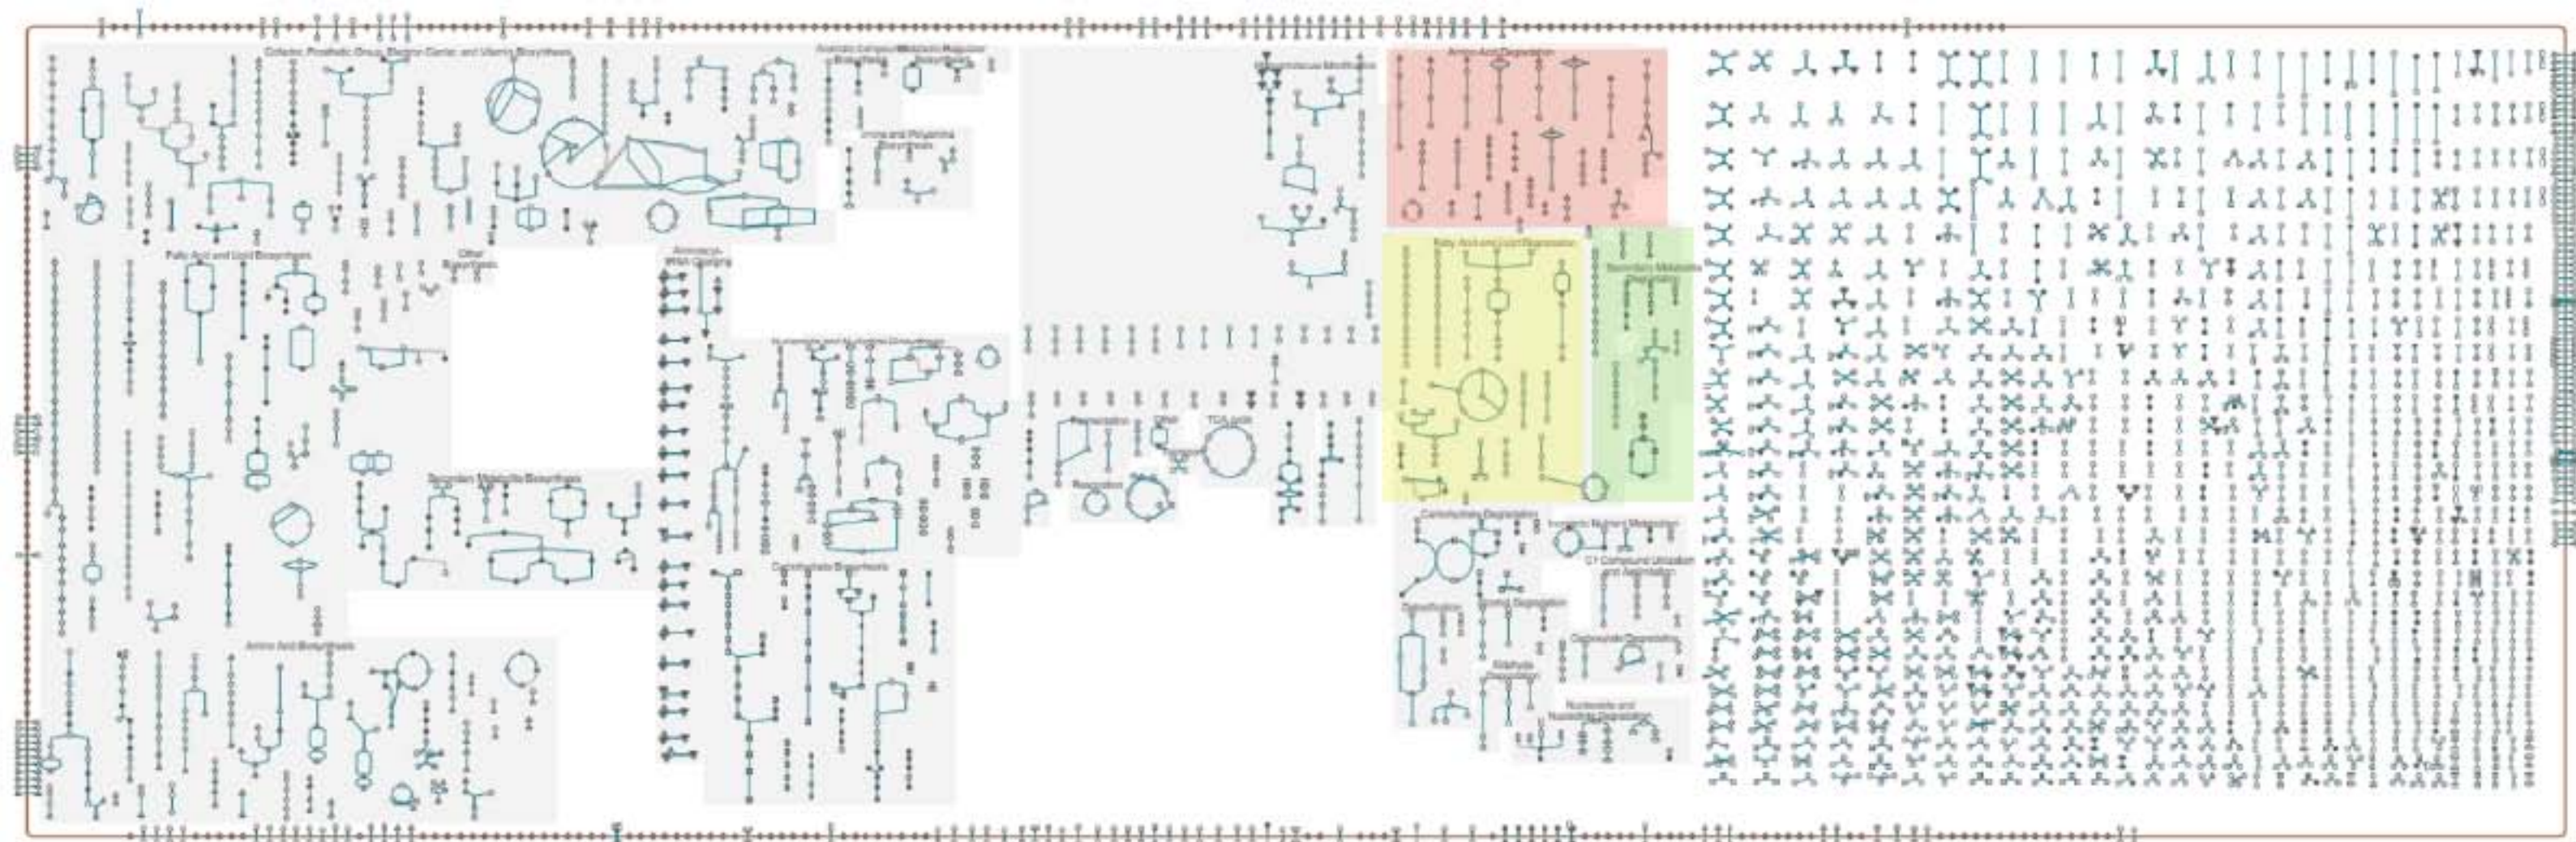

Figure S2. Comprehensive Metabolic Network Map of Yeast (*S. cerevisiae*)



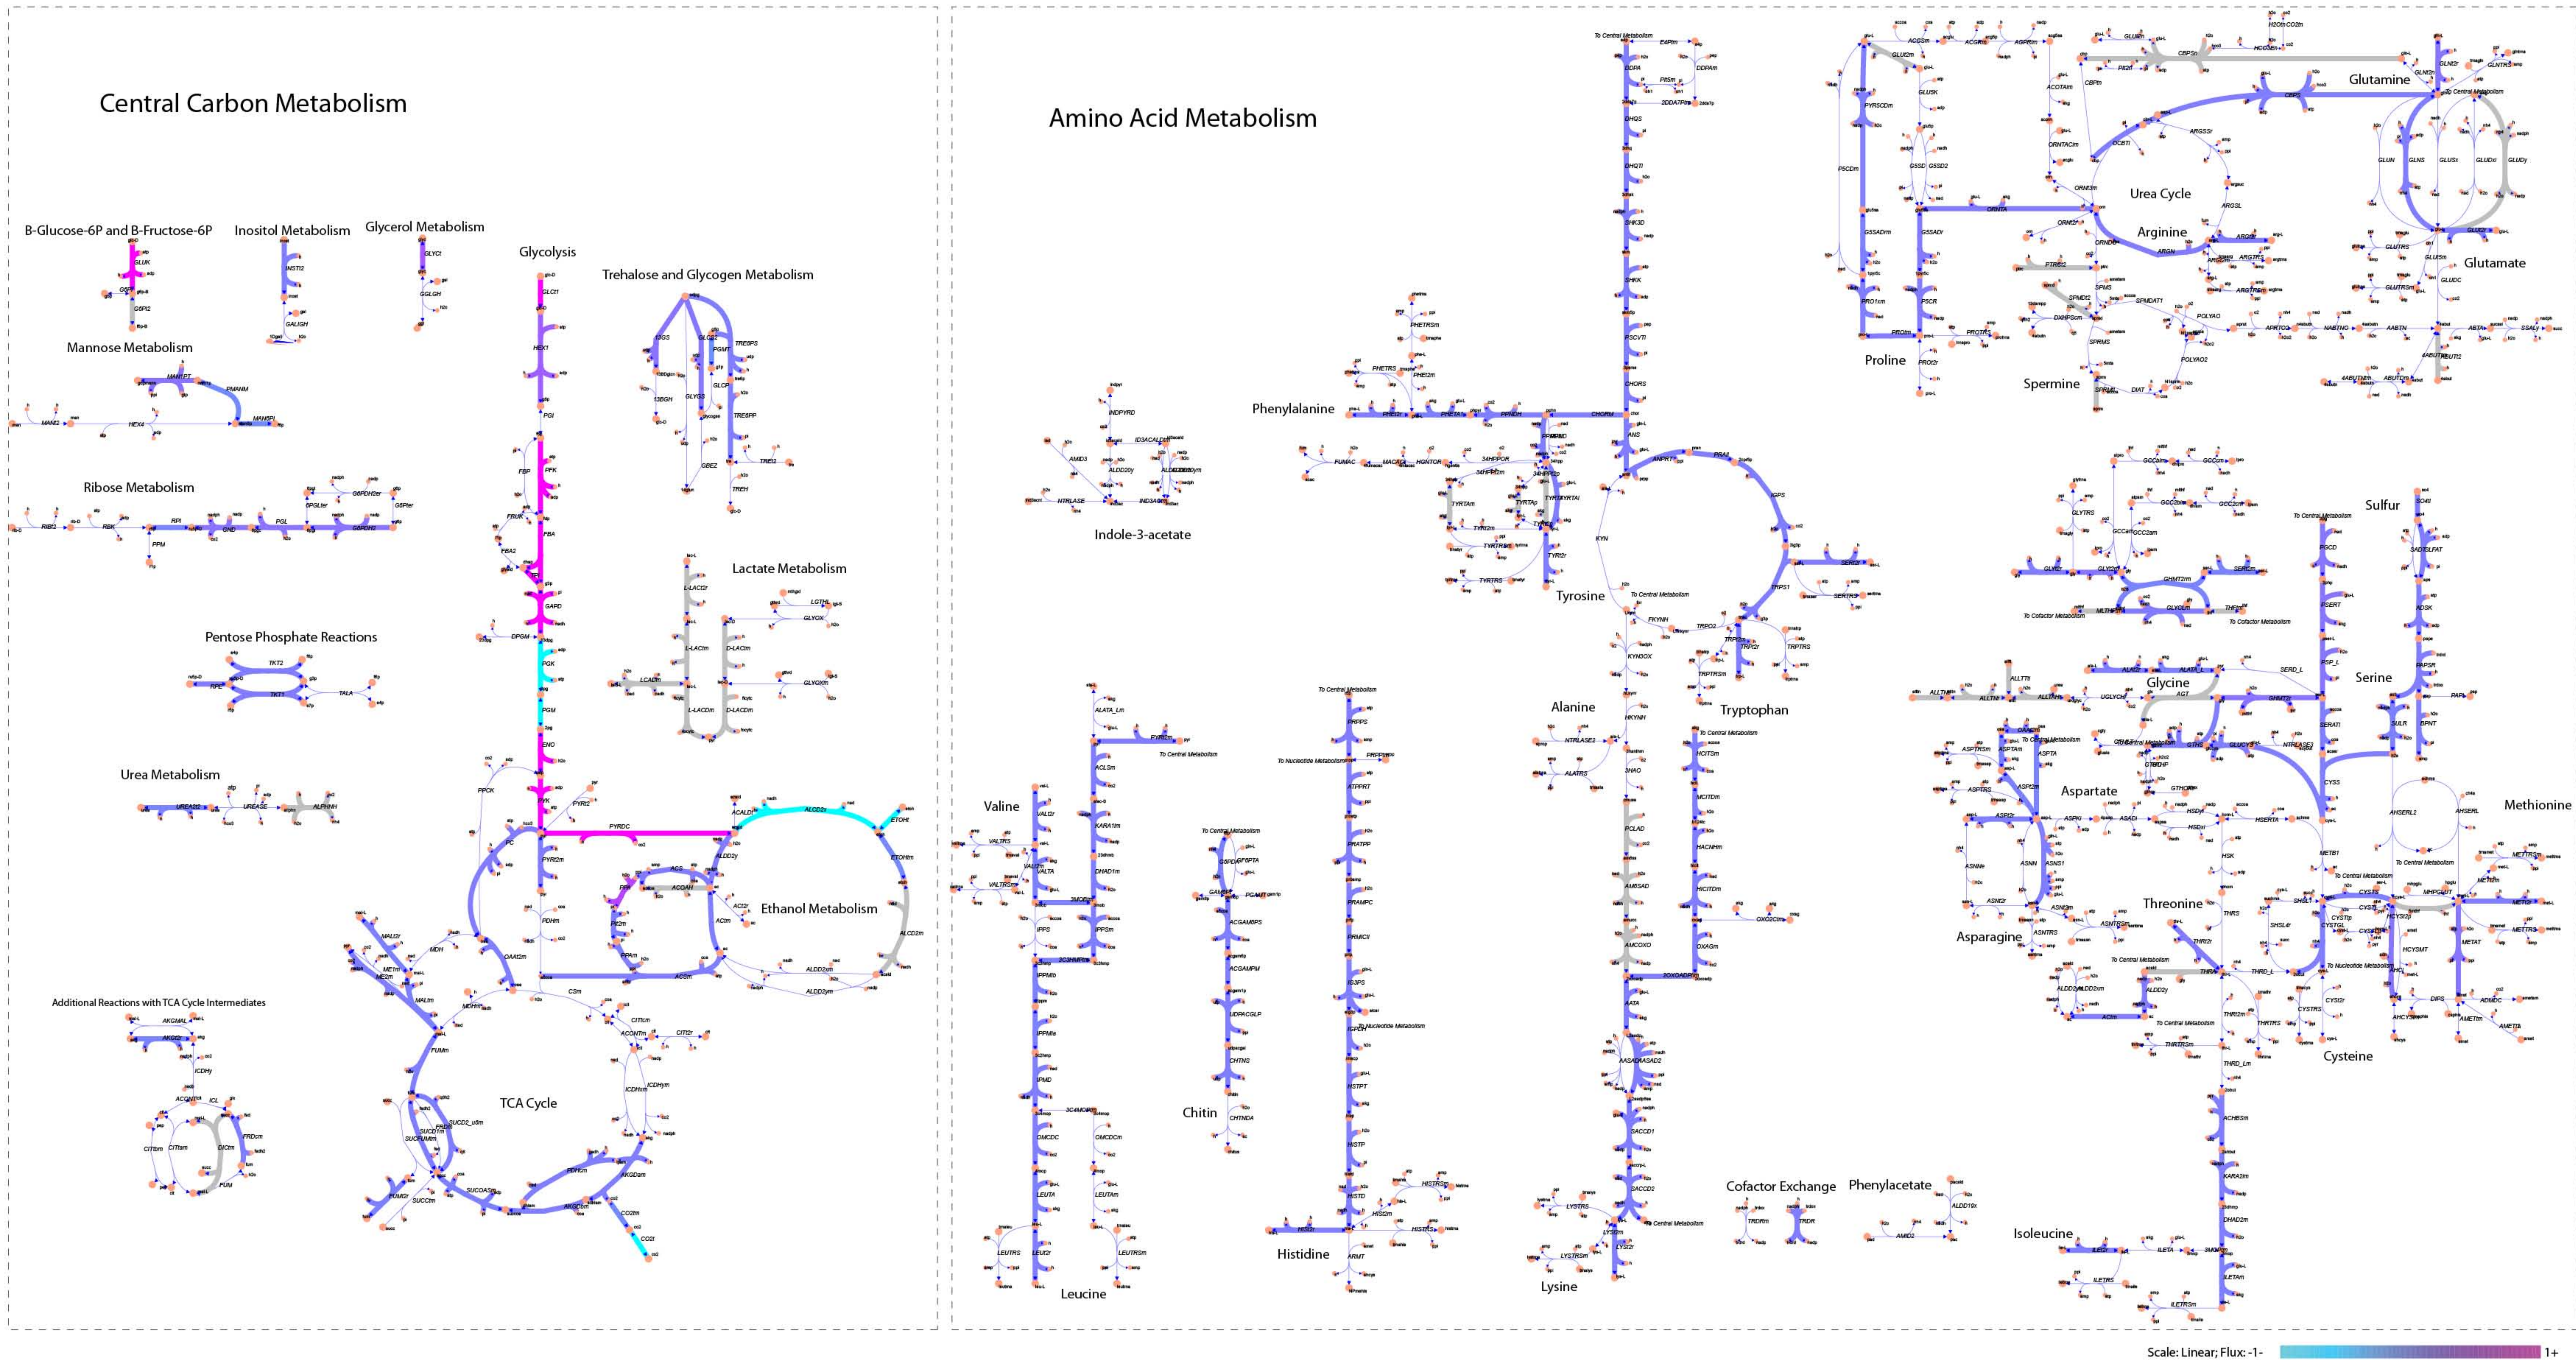

Figure S3. Network map of central carbon metabolism (left) and amino acid metabolism (right). Network fluxes were determined using data from Case I where the network illustrates the optimal solution from FBA. The fluxes were scaled between -1 and +1 for ease of visualization.



## Central Carbon Metabolism

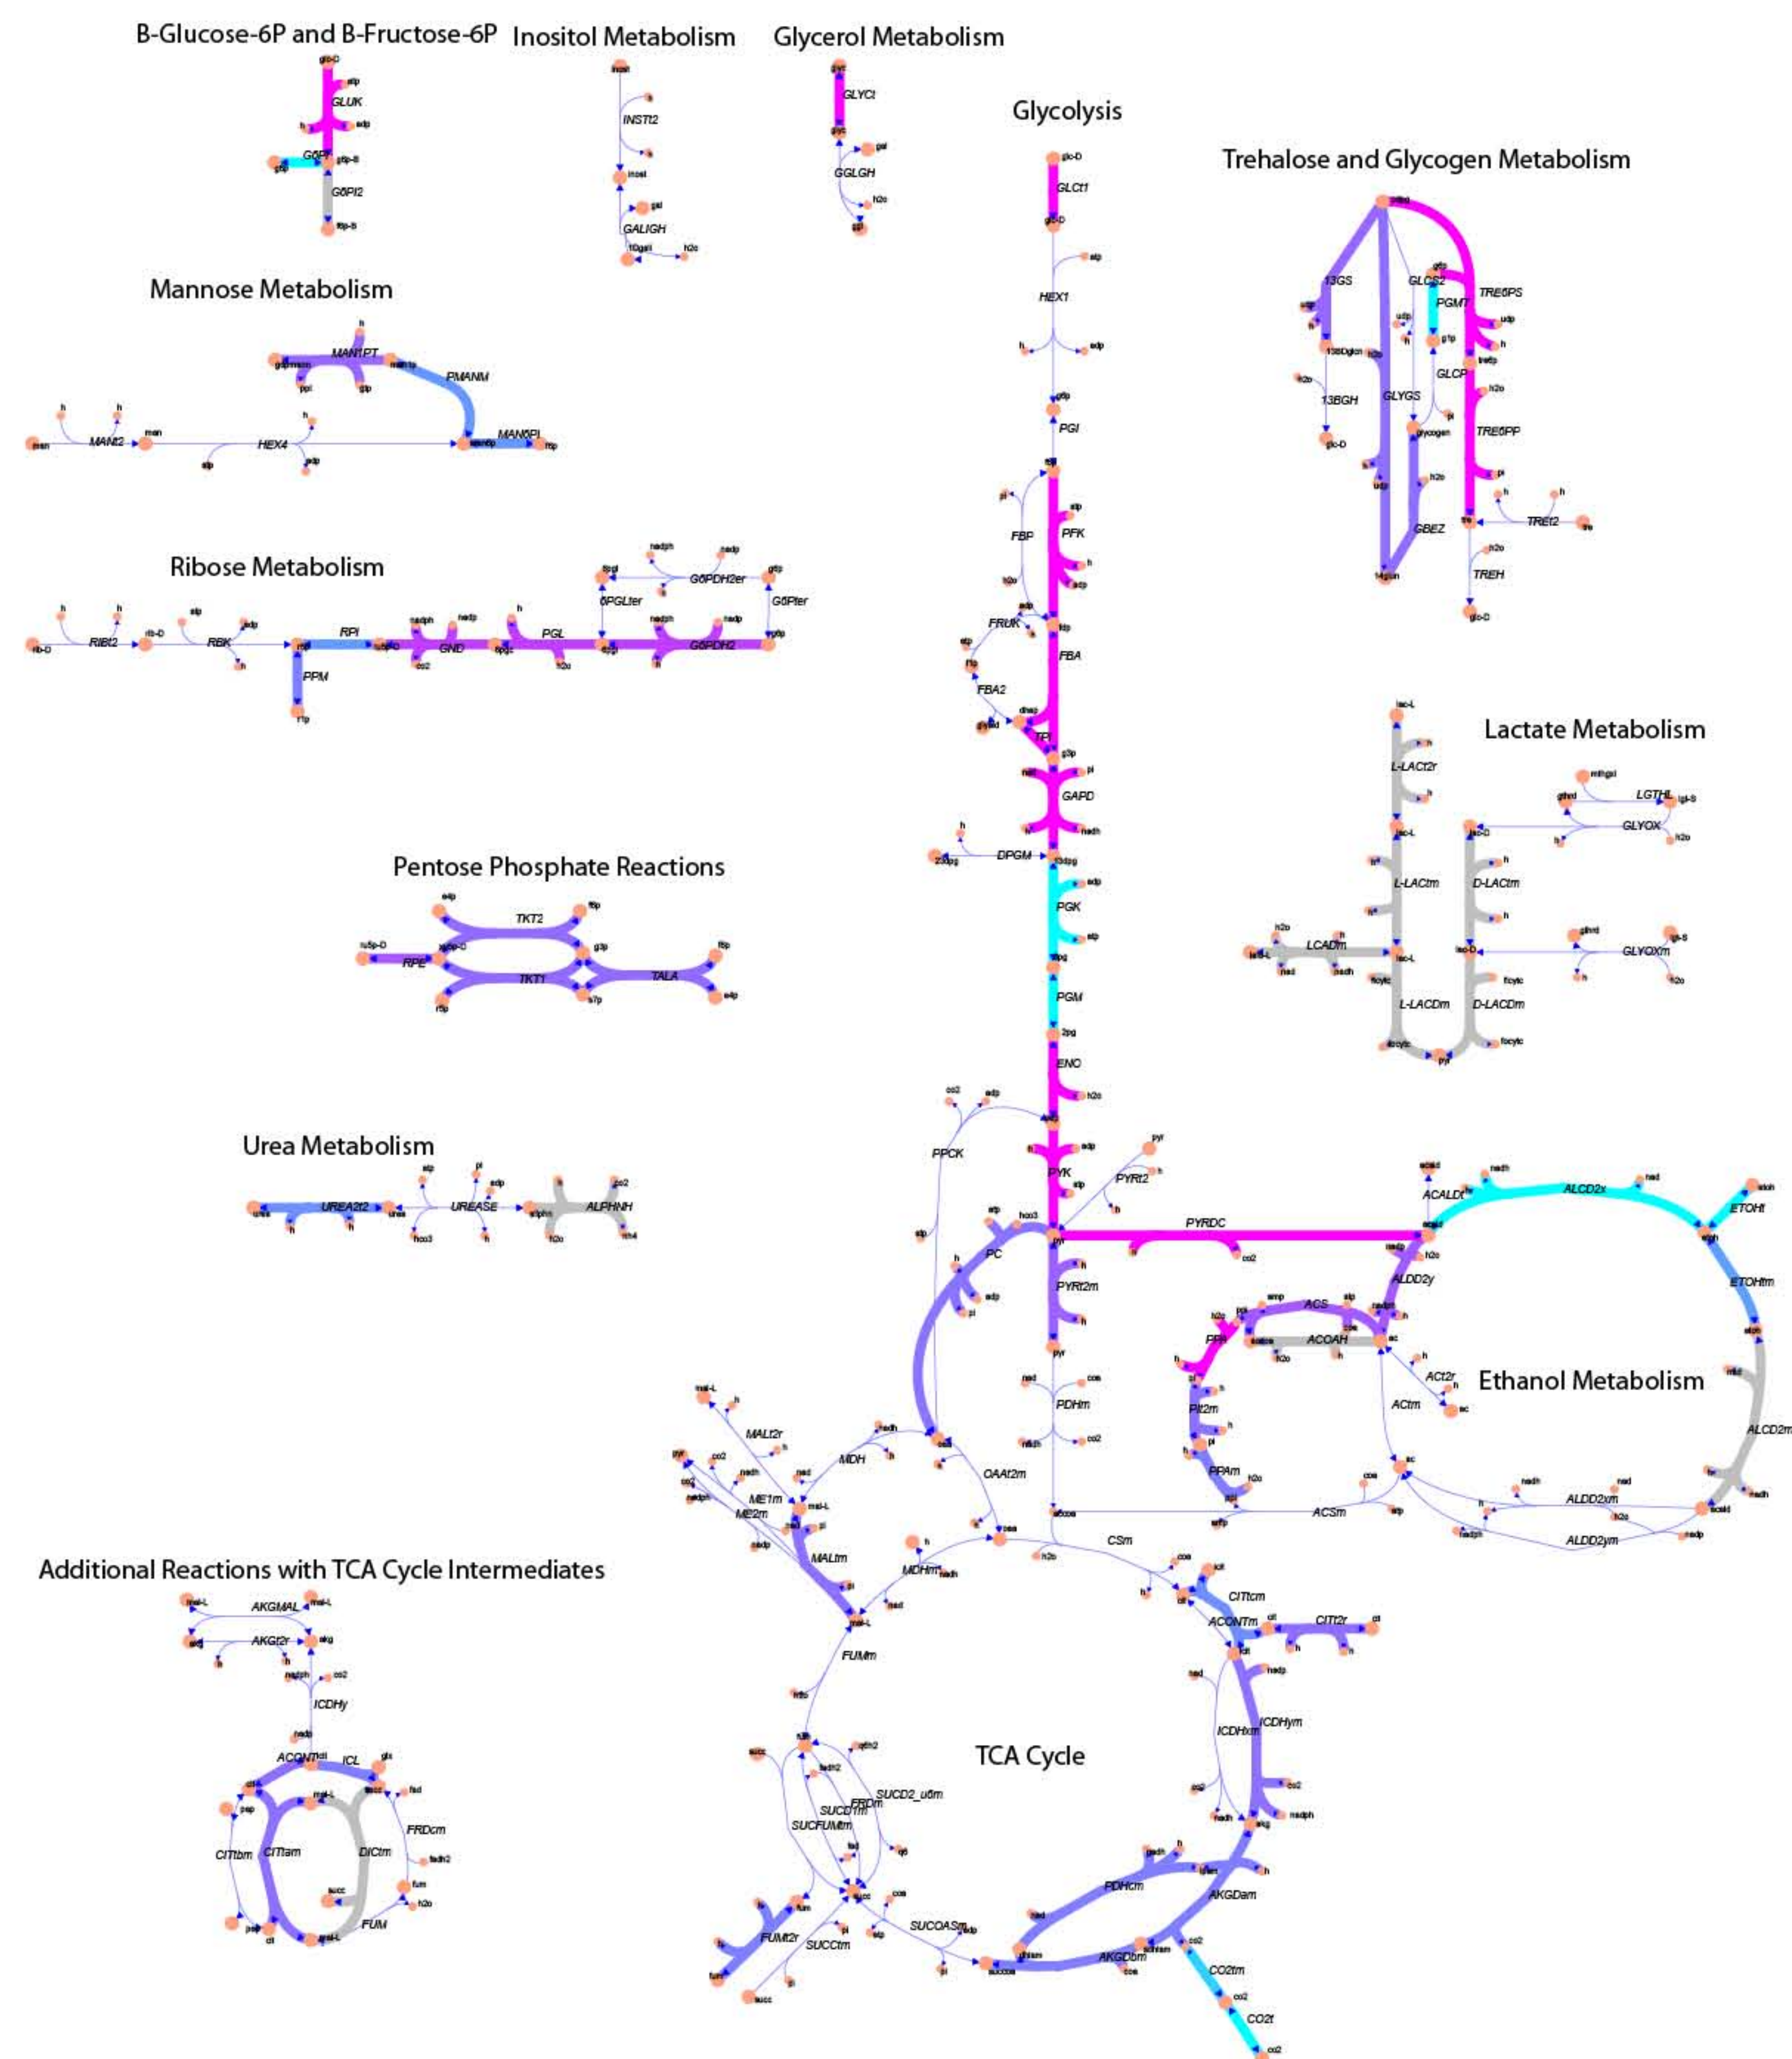

## Amino Acid Metabolism

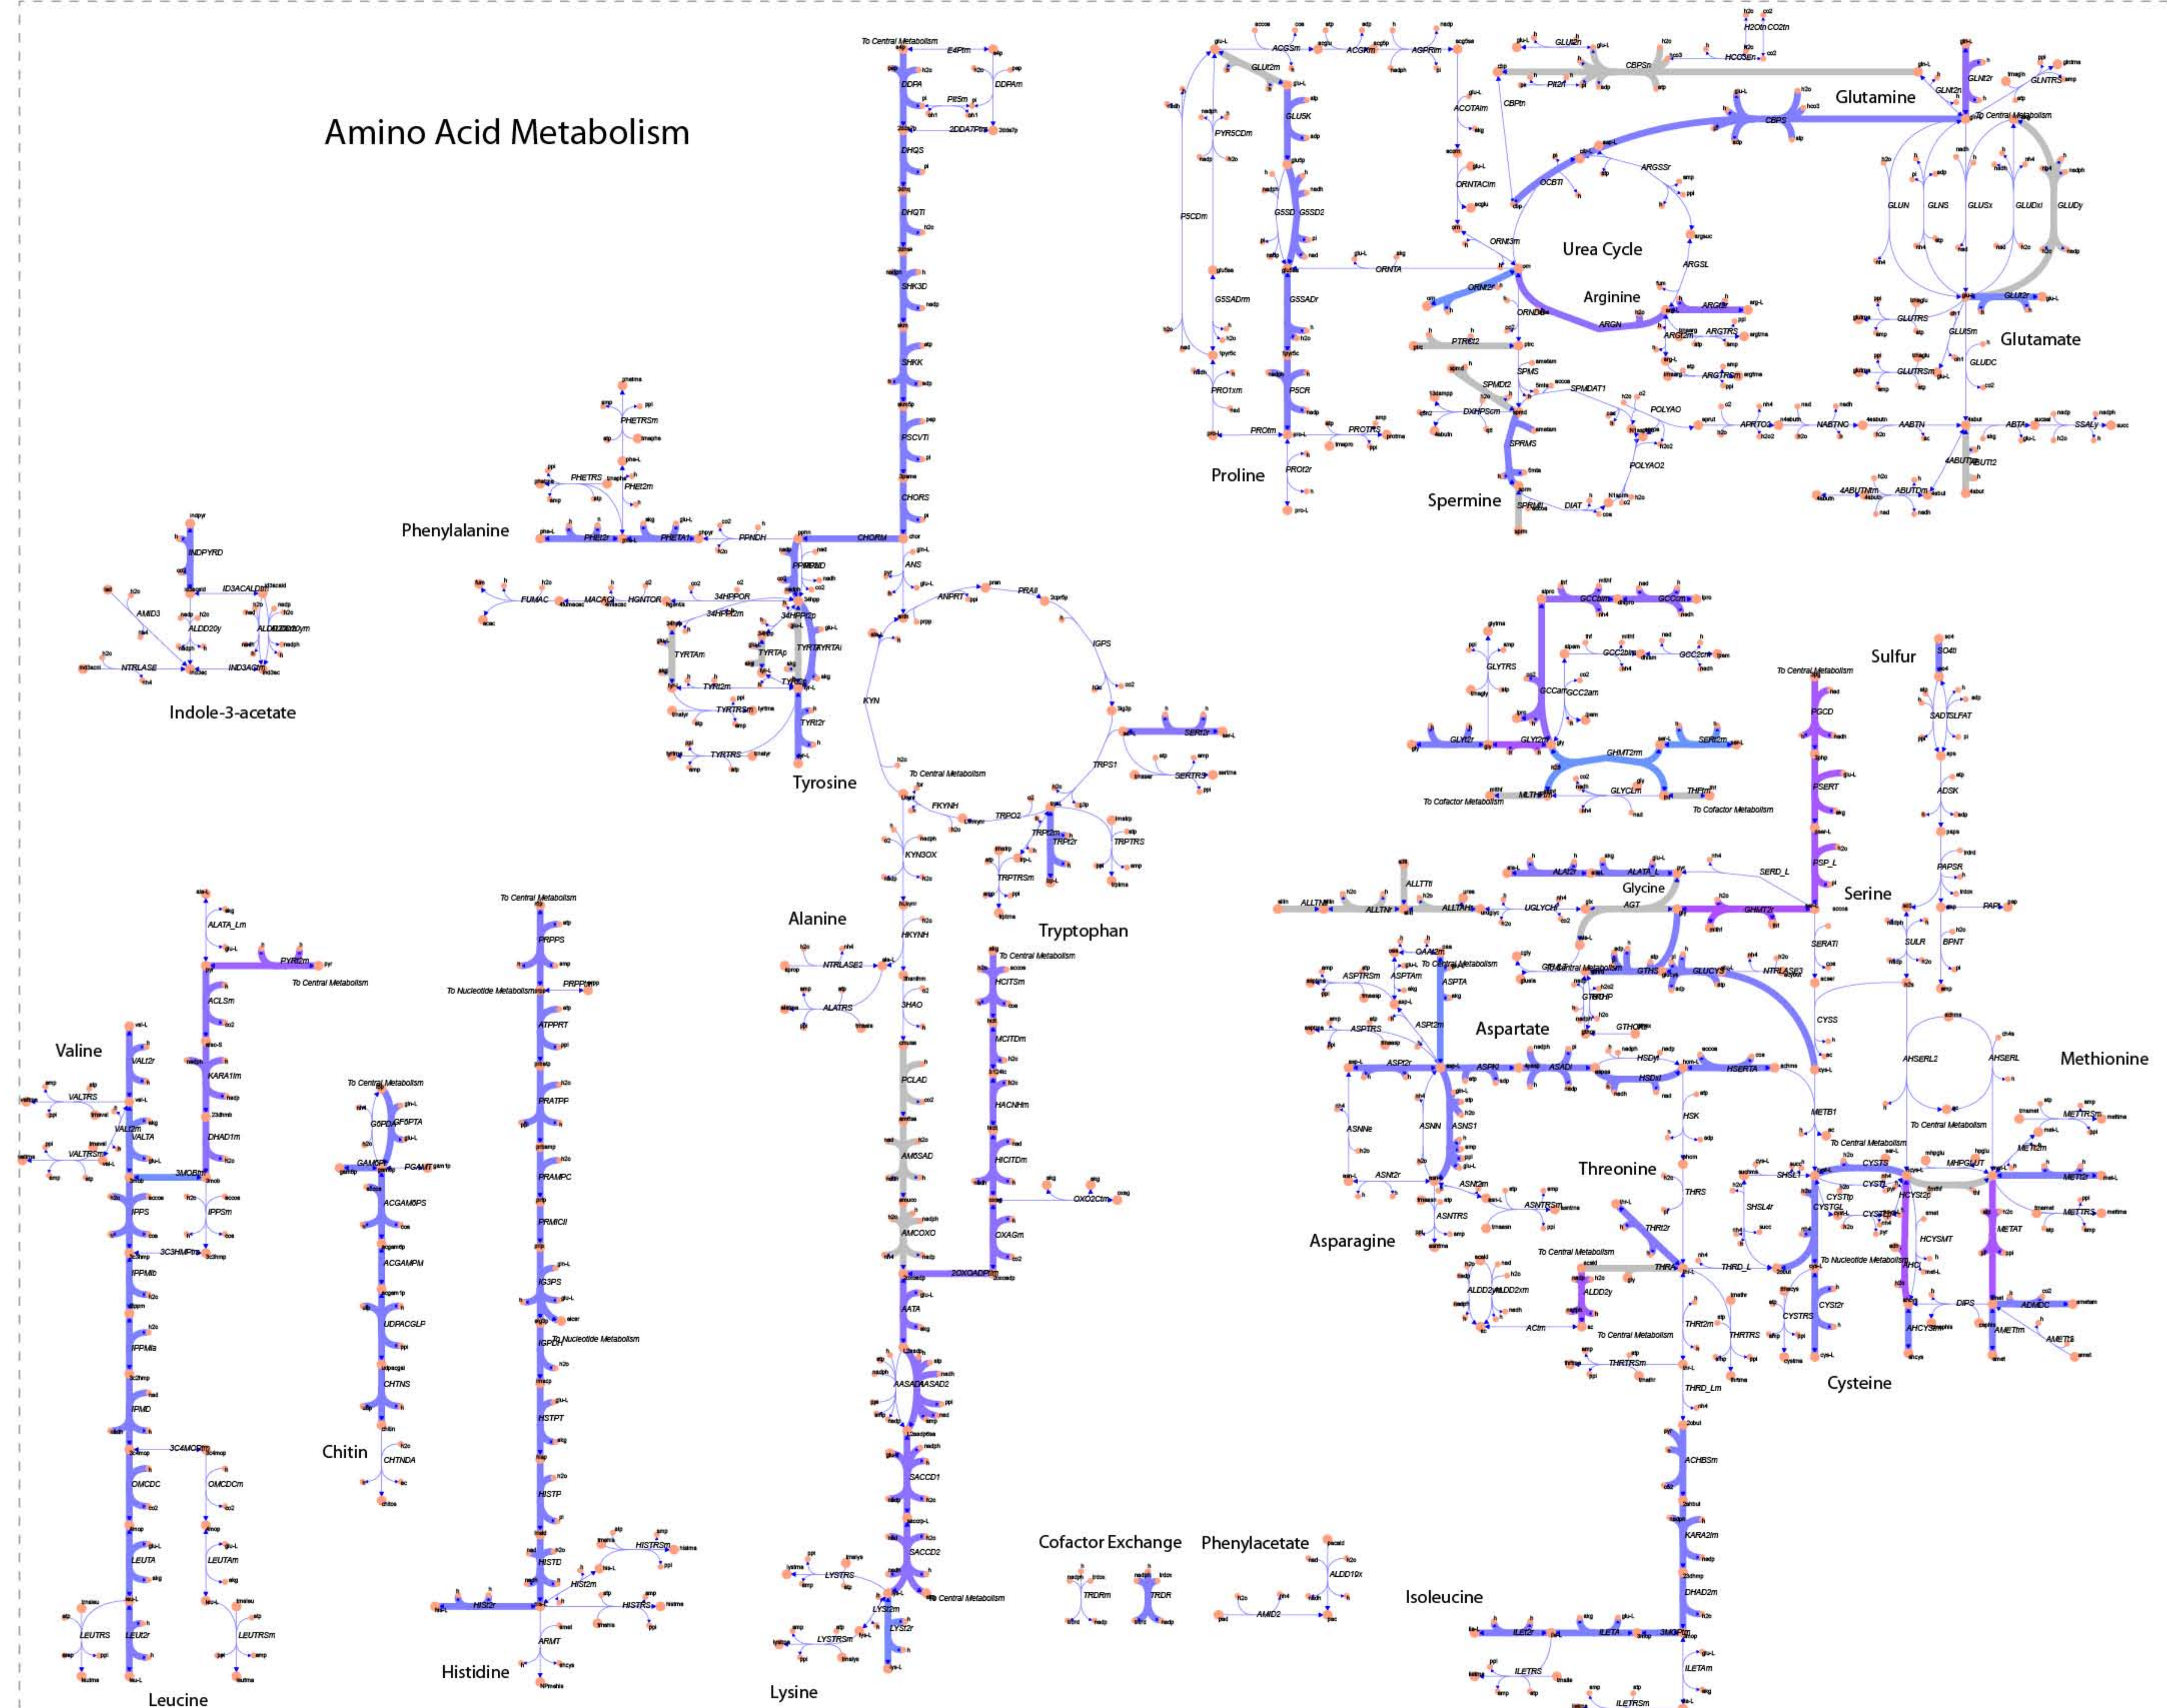

Scale: Linear; Flux: -1- 1+

Figure S4. Network map of central carbon metabolism (left) and amino acid metabolism (right). Network fluxes were determined using data from Case II where the network illustrates the optimal solution from FBA. The fluxes were scaled between -1 and +1 for ease of visualization.
