# Supplementary material
Source: MDPI journal article supplement (https://www.mdpi.com/2227-9717/8/9/1195)
Supplement: s1 [file s1]

## Added Ehrlich and Ester Forming Pathways

Table S1 Added Genes to current GSMM

| Gene Name | Gene Short Name |
|-----------|-----------------|
| YPL095C   | EEB1            |
| YBR177C   | EHT1            |
| YGR015C   | EAT1            |

Table S2 Added Metabolites Added to current GSMM

| NAME            | MIRIAM                                                                             | COMPOSITION    | COMPARTMENT | REPLACEMENT ID | CHARGE |
|-----------------|------------------------------------------------------------------------------------|----------------|-------------|----------------|--------|
| hexanoyl-CoA    | chebi/CHEBI:27540;kegg.compound/C00642;metanetx.chemical/MNXM553;sbo/SBO:0000247   | C27H46N7O17P3S | m           | s_4207         | -4     |
| ethyl hexanoate | chebi/CHEBI:86055;metanetx.chemical/MNXM52763;sbo/SBO:0000247                      | C8H16O2        | m           | s_4208         | 0      |
| ethyl hexanoate | chebi/CHEBI:86055;metanetx.chemical/MNXM52763;sbo/SBO:0000247                      | C8H16O2        | c           | s_4209         | 0      |
| ethyl hexanoate | chebi/CHEBI:86055;metanetx.chemical/MNXM52763;sbo/SBO:0000247                      | C8H16O2        | e           | s_4210         | 0      |
| octanoyl-CoA    | chebi/ChEBI:15533;kegg.compound/C01944;metanetx.chemical/MNXM342;sbo/SBO:0000247   | C29H46N7O17P3S | m           | s_4211         | -4     |
| ethyl octanoate | chebi/ChEBI:87426;kegg.compound/C12292;metanetx.chemical/MNXM52785;sbo/SBO:0000247 | C10H20O2       | m           | s_4212         | 0      |
| ethyl octanoate | chebi/ChEBI:87426;kegg.compound/C12292;metanetx.chemical/MNXM52785;sbo/SBO:0000247 | C10H20O2       | c           | s_4213         | 0      |
| ethyl octanoate | chebi/ChEBI:87426;kegg.compound/C12292;metanetx.chemical/MNXM52785;sbo/SBO:0000247 | C10H20O2       | e           | s_4214         | 0      |
| butanoyl-CoA    | chebi/ChEBI:57371;kegg.compound/C00136;metanetx.chemical/MNXM233;sbo/SBO:0000247   | C25H38N7O17P3S | m           | s_4215         | -4     |
| ethyl butanoate | chebi/ChEBI:88764;metanetx.chemical/MNXM11527;sbo/SBO:0000247                      | C6H12O2        | m           | s_4216         | 0      |
| ethyl butanoate | chebi/ChEBI:88764;metanetx.chemical/MNXM11527;sbo/SBO:0000247                      | C6H12O2        | c           | s_4217         | 0      |
| ethyl butanoate | chebi/ChEBI:88764;metanetx.chemical/MNXM11527;sbo/SBO:0000247                      | C6H12O2        | e           | s_4218         | 0      |
| hexan-1-ol      | chebi/ChEBI:87393;metanetx.chemical/MNXM18358;sbo/SBO:0000247                      | C6H14O         | c           | s_4219         | 0      |
| hexyl acetate   | chebi/ChEBI:87510;metanetx.chemical/MNXM99284;sbo/SBO:0000247                      | C8H16O2        | m           | s_4220         | 0      |
| hexyl acetate   | chebi/ChEBI:87510;metanetx.chemical/MNXM99284;sbo/SBO:0000247                      | C8H16O2        | c           | s_4221         | 0      |
| hexyl acetate   | chebi/ChEBI:87510;metanetx.chemical/MNXM99284;sbo/SBO:0000247                      | C8H16O2        | e           | s_4222         | 0      |
| decanoyl-CoA    | chebi/ChEBI:61430;kegg.compound/C05274;metanetx.chemical/MNXM486;sbo/SBO:0000247   | C31H50N7O17P3S | c           | s_4223         | -4     |
| ethyl decanoate | chebi/ChEBI:87430;metanetx.chemical/MNXM100679;sbo/SBO:0000247                     | C12H24O2       | m           | s_4224         | 0      |
| ethyl decanoate | chebi/ChEBI:87430;metanetx.chemical/MNXM100679;sbo/SBO:0000247                     | C12H24O2       | c           | s_4225         | 0      |
| ethyl decanoate | chebi/ChEBI:87430;metanetx.chemical/MNXM100679;sbo/SBO:0000247                     | C12H24O2       | e           | s_4226         | 0      |

|                                |                                                                                   |         |   |        |   |
|--------------------------------|-----------------------------------------------------------------------------------|---------|---|--------|---|
| ethyl acetate                  | chebi/CHEBI:27750;kegg.compound/C00849;metanetx.chemical/MNXM8595;sbo/SBO:0000247 | C4H8O2  | m | s_4227 | 0 |
| propanal                       | chebi/CHEBI:17153;kegg.compound/C00479;metanetx.chemical/MNXM821;sbo/SBO:0000247  | C3H6O   | c | s_4228 | 0 |
| propanal                       | chebi/CHEBI:17153;kegg.compound/C00479;metanetx.chemical/MNXM821;sbo/SBO:0000247  | C3H6O   | m | s_4229 | 0 |
| propanal                       | chebi/CHEBI:17153;kegg.compound/C00479;metanetx.chemical/MNXM821;sbo/SBO:0000247  | C3H6O   | e | s_4230 | 0 |
| propanol                       | chebi/CHEBI:28831;kegg.compound/C05979;metanetx.chemical/MNXM6396;sbo/SBO:0000247 | C3H8O   | c | s_4231 | 0 |
| propanol                       | chebi/CHEBI:28831;kegg.compound/C05979;metanetx.chemical/MNXM6396;sbo/SBO:0000247 | C3H8O   | m | s_4232 | 0 |
| propanol                       | chebi/CHEBI:28831;kegg.compound/C05979;metanetx.chemical/MNXM6396;sbo/SBO:0000247 | C3H8O   | e | s_4233 | 0 |
| methional                      | chebi/CHEBI:49017;metanetx.chemical/MNXM6829;sbo/SBO:0000247                      | C4H8OS  | c | s_4234 | 0 |
| methional                      | chebi/CHEBI:49017;metanetx.chemical/MNXM6829;sbo/SBO:0000247                      | C4H8OS  | m | s_4235 | 0 |
| methional                      | chebi/CHEBI:49017;metanetx.chemical/MNXM6829;sbo/SBO:0000247                      | C4H8OS  | e | s_4236 | 0 |
| methionol                      | chebi/CHEBI:49019;metanetx.chemical/MNXM14592;sbo/SBO:0000247                     | C4H10OS | c | s_4237 | 0 |
| methionol                      | chebi/CHEBI:49019;metanetx.chemical/MNXM14592;sbo/SBO:0000247                     | C4H10OS | m | s_4238 | 0 |
| methionol                      | chebi/CHEBI:49019;metanetx.chemical/MNXM14592;sbo/SBO:0000247                     | C4H10OS | e | s_4239 | 0 |
| (4-hydroxyphenyl) acetaldehyde | chebi/CHEBI:15621;sbo/SBO:0000247                                                 | C8H8O2  | c | s_4240 | 0 |
| (4-hydroxyphenyl) acetaldehyde | chebi/CHEBI:15621;sbo/SBO:0000247                                                 | C8H8O2  | m | s_4241 | 0 |
| (4-hydroxyphenyl) acetaldehyde | chebi/CHEBI:15621;sbo/SBO:0000247                                                 | C8H8O2  | e | s_4242 | 0 |
| tyrosol                        | chebi/CHEBI:1879;kegg.compound/C06044;sbo/SBO:0000247                             | C8H10O2 | c | s_4243 | 0 |
| tyrosol                        | chebi/CHEBI:1879;kegg.compound/C06044;sbo/SBO:0000247                             | C8H10O2 | m | s_4244 | 0 |
| tyrosol                        | chebi/CHEBI:1879;kegg.compound/C06044;sbo/SBO:0000247                             | C8H10O2 | e | s_4245 | 0 |

Table S3 Added Reactions to current GSMM

| ID     | NAME                                   | EQUATION                                                            | EC-NUMBER | GENE ASSOCIATION   |
|--------|----------------------------------------|---------------------------------------------------------------------|-----------|--------------------|
| r_4629 | alcohol acyltransferase (hexanoyl-CoA) | hexanoyl-CoA[m] + ethanol[m] <=> ethyl hexanoate[m] + coenzyme A[m] | 2.3.1.84  | YBR177C or YPL095C |
| r_4630 | alcohol acyltransferase (octanoyl-CoA) | octanoyl-CoA[m] + ethanol[m] <=> ethyl octanoate[m] + coenzyme A[m] | 2.3.1.84  | YBR177C or YPL095C |
| r_4631 | alcohol acyltransferase (butyryl-CoA)  | butanoyl-CoA[m] + ethanol[m] <=> ethyl butanoate[m] + coenzyme A[m] | 2.3.1.84  | YBR177C or YPL095C |
| r_4632 | alcohol acyltransferase                | acetyl-CoA[m] + hexan-1-ol[m]                                       | 2.3.1.84  | YBR177C or         |

|        |                                           |                                                                                       |                    |                                        |
|--------|-------------------------------------------|---------------------------------------------------------------------------------------|--------------------|----------------------------------------|
|        | (acetyl-CoA)                              | $\rightleftharpoons$ hexyl acetate[m] + coenzyme A[m]                                 |                    | YPL095C                                |
| r_4633 | alcohol acyltransferase (decanoyl-CoA)    | decanoyl-CoA[m] + ethanol[m] $\rightleftharpoons$ ethyl decanoate[m] + coenzyme A[m]  | 2.3.1.84           | YBR177C or YPL095C                     |
| r_4634 | ethyl hexanoate transport, mitochondrial  | ethyl hexanoate[m] $\rightleftharpoons$ ethyl hexanoate[c]                            |                    |                                        |
| r_4635 | ethyl octanoate transport, mitochondrial  | ethyl octanoate[m] $\rightleftharpoons$ ethyl octanoate[c]                            |                    |                                        |
| r_4636 | ethyl butanoate transport, mitochondrial  | ethyl butanoate[m] $\rightleftharpoons$ ethyl butanoate[c]                            |                    |                                        |
| r_4637 | hexyl acetate transport, mitochondrial    | hexyl acetate[m] $\Rightarrow$ hexyl acetate[c]                                       |                    |                                        |
| r_4638 | ethyl decanoate transport, mitochondrial  | ethyl decanoate[m] $\Rightarrow$ ethyl decanoate[c]                                   |                    |                                        |
| r_4639 | ethyl hexanoate transport                 | ethyl hexanoate[c] $\rightleftharpoons$ ethyl hexanoate[e]                            |                    |                                        |
| r_4640 | ethyl octanoate transport                 | ethyl octanoate[c] $\rightleftharpoons$ ethyl octanoate[e]                            |                    |                                        |
| r_4641 | ethyl butanoate transport                 | ethyl butanoate[c] $\rightleftharpoons$ ethyl butanoate[e]                            |                    |                                        |
| r_4642 | hexyl acetate transport                   | hexyl acetate[c] $\Rightarrow$ hexyl acetate[e]                                       |                    |                                        |
| r_4643 | ethyl decanoate transport                 | ethyl decanoate[c] $\Rightarrow$ ethyl decanoate[e]                                   |                    |                                        |
| r_4644 | ethyl hexanoate exchange                  | ethyl hexanoate[e] $\rightleftharpoons$                                               |                    |                                        |
| r_4645 | ethyl octanoate exchange                  | ethyl octanoate[e] $\rightleftharpoons$                                               |                    |                                        |
| r_4646 | ethyl butanoate exchange                  | ethyl butanoate[e] $\rightleftharpoons$                                               |                    |                                        |
| r_4647 | hexyl acetate exchange                    | hexyl acetate[e] $\rightleftharpoons$                                                 |                    |                                        |
| r_4648 | ethyl decanoate exchange                  | ethyl decanoate[e] $\rightleftharpoons$                                               |                    |                                        |
| r_4649 | mitochondrial ethanol O-acetyltransferase | ethanol[m] + acetyl-CoA[m] $\Rightarrow$ ethyl acetate[m] + coenzyme A[m]             | 2.3.1.268          | YGR015C                                |
| r_4650 | ethyl acetate transport, mitochondrial    | ethyl acetate[m] $\Rightarrow$ ethyl acetate[c]                                       |                    |                                        |
| r_4651 | pyruvate decarboxylase (aldehyde-forming) | H+[c] + 2-oxobutanoate[c] $\Rightarrow$ carbon dioxide[c] + propanal[c]               | 4.1.1.1            | YGR087C or YLR044C or YLR134W          |
| r_4652 | aldehyde dehydrogenase (1-propanol, NAD)  | propanal[c] + H+[c] + NADH[c] $\Rightarrow$ propanol[c] + NAD[c]                      | 1.1.1.-; 1.1.1.284 | 1.1.1.1; YBR145W or YDL168W or YOL086C |
| r_4653 | aldehyde dehydrogenase (1-propanol, NAD)  | propanal[m] + H+[m] + NADH[m] $\Rightarrow$ propanol[m] + NAD[m]                      | 1.1.1.1            | YGL256W or YMR083W                     |
| r_4654 | aldehyde dehydrogenase (1-propanol, NADP) | propanal[c] + H+[c] + NADPH[c] $\Rightarrow$ propanol[c] + NADP(+)[c]                 | 1.1.1.-; 1.1.1.2   | YCR105W or YDR368W or YMR318C          |
| r_4655 | 1-propyl alcohol transport, mitochondrial | propanol[c] $\rightleftharpoons$ propanol[m]                                          |                    |                                        |
| r_4656 | propanal transport, cytosol               | propanal[c] $\rightleftharpoons$ propanal[e]                                          |                    |                                        |
| r_4657 | 1-propyl alcohol transport, cytosol       | propanol[c] $\rightleftharpoons$ propanol[e]                                          |                    |                                        |
| r_4658 | propanal exchange                         | propanal[e] $\Rightarrow$                                                             |                    |                                        |
| r_4659 | propanol exchange                         | propanol[e] $\Rightarrow$                                                             |                    |                                        |
| r_4660 | 2-oxo acid decarboxylase                  | H+[c] + 4-methylthio-2-oxobutanoate[c] $\Rightarrow$ carbon dioxide[c] + methional[c] | 4.1.1.1            | YHR137W                                |

|        |                                                         |                                                                                                           |                    |          |                               |          |
|--------|---------------------------------------------------------|-----------------------------------------------------------------------------------------------------------|--------------------|----------|-------------------------------|----------|
| r_4661 | aldehyde dehydrogenase<br>(methionol, NAD)              | methional[c] + H+[c] + NADH[c]<br>=> methional[c] + NAD[c]                                                | 1.1.1.-; 1.1.1.284 | 1.1.1.1; | YBR145W<br>YDL168W<br>YOL086C | or<br>or |
| r_4662 | aldehyde dehydrogenase<br>(methionol, NAD)              | methional[m] + H+[m] +<br>NADH[m] => methional[m] +<br>NAD[m]                                             | 1.1.1.1            |          | YGL256W<br>YMR083W            | or       |
| r_4663 | aldehyde dehydrogenase<br>(methionol, NADP)             | methional[c] + H+[c] + NADPH[c]<br>=> methional[c] + NADP(+)[c]                                           | 1.1.1.-; 1.1.1.2   |          | YCR105W<br>YDR368W<br>YMR318C | or<br>or |
| r_4664 | methionol transport,<br>mitochondrial                   | methional[c] <=> methional[m]                                                                             |                    |          |                               |          |
| r_4665 | methional transport, cytosol                            | methional[c] <=> methional[e]                                                                             |                    |          |                               |          |
| r_4666 | methionol transport, cytosol                            | methional[c] <=> methional[e]                                                                             |                    |          |                               |          |
| r_4667 | methional exchange                                      | methional[e] =>                                                                                           |                    |          |                               |          |
| r_4668 | methionol exchange                                      | methional[e] =>                                                                                           |                    |          |                               |          |
| r_4669 | pyruvate decarboxylase<br>(hydroxy-phenyl)              | H+[c] + 3-(4-<br>hydroxyphenyl)pyruvate[c] =><br>carbon dioxide[c] + (4-<br>hydroxyphenyl)acetaldehyde[c] | 4.1.1.1            |          | YGR087C<br>YLR044C<br>YLR134W | or<br>or |
| r_4670 | aldehyde dehydrogenase<br>(tyrosol, NAD)                | (4-hydroxyphenyl)acetaldehyde[c]<br>+ H+[c] + NADH[c] => tyrosol[c]<br>+ NAD[c]                           | 1.1.1.-; 1.1.1.284 | 1.1.1.1; | YBR145W<br>YDL168W<br>YOL086C | or<br>or |
| r_4671 | aldehyde dehydrogenase<br>(tyrosol, NAD)                | (4-hydroxyphenyl)acetaldehyde[m]<br>+ H+[m] + NADH[m] =><br>tyrosol[m] + NAD[m]                           | 1.1.1.1            |          | YGL256W<br>YMR083W            | or       |
| r_4672 | aldehyde dehydrogenase<br>(tyrosol, NADP)               | (4-hydroxyphenyl)acetaldehyde[c]<br>+ H+[c] + NADPH[c] => tyrosol[c]<br>+ NADP(+)[c]                      | 1.1.1.-; 1.1.1.2   |          | YCR105W<br>YDR368W<br>YMR318C | or<br>or |
| r_4673 | tyrosol transport,<br>mitochondrial                     | tyrosol[c] <=> tyrosol[m]                                                                                 |                    |          |                               |          |
| r_4674 | (4-<br>hydroxyphenyl)acetaldehyde<br>transport, cytosol | (4-hydroxyphenyl)acetaldehyde[c]<br><=> (4-<br>hydroxyphenyl)acetaldehyde[e]                              |                    |          |                               |          |
| r_4675 | tyrosol transport, cytosol                              | tyrosol[c] <=> tyrosol[e]                                                                                 |                    |          |                               |          |
| r_4676 | (4-<br>hydroxyphenyl)acetaldehyde<br>exchange           | (4-hydroxyphenyl)acetaldehyde[e]<br>=>                                                                    |                    |          |                               |          |
| r_4677 | tyrosol exchange                                        | tyrosol[e] =>                                                                                             |                    |          |                               |          |

**Table S4.** Experimentally measured consumption/production rates of the different metabolites analyzed from Quiros et al. 2013 and constraints used in the study.

|                      | 240 g L <sup>-1</sup> Glucose          |                                        | 280 g L <sup>-1</sup> Glucose          |                                        | Constraint: Lower and Upper Bound                    |
|----------------------|----------------------------------------|----------------------------------------|----------------------------------------|----------------------------------------|------------------------------------------------------|
| Reaction Constraint  | 16 °C (Case III)                       | 28 °C (Case IV)                        | 16 °C (Case I)                         | 28 °C (Case II)                        |                                                      |
|                      | mmol gDW <sup>-1</sup> h <sup>-1</sup>               |
| Glucose[ex]          | -4.76                                  | -20.51                                 | -4.19                                  | -16.31                                 | LB = EV and UB =1000                                 |
| Glycerol[ex]         | 0.38                                   | 1.37                                   | 0.34                                   | 1.39                                   | 2) LB = 1000 and UB =1000<br>3) LB = 1000 and UB =EV |
| Ethanol[ex]          | 8.29                                   | 25.7                                   | 6.79                                   | 21.47                                  | 2) LB = 1000 and UB =1000<br>3) LB = 1000 and UB =EV |
| Succinic acid[ex]    | 0.02                                   | 0.04                                   | 0.01                                   | 0.03                                   | 2) LB = 1000 and UB =1000<br>3) LB = 1000 and UB =EV |
| Acetic acid[ex]      | 0.12                                   | 0.29                                   | 0.12                                   | 0.36                                   | 2) LB = 1000 and UB =1000<br>3) LB = 1000 and UB =EV |
| Lactic acid[ex]      | -                                      | 0.1157                                 | -                                      | 0.0424                                 | 2) LB = 1000 and UB =1000<br>3) LB = 1000 and UB =EV |
| Ala[ex]              | -0.0353                                | -0.0925                                | -0.0178                                | -0.0705                                | LB = EV and UB =1000                                 |
| Arg[ex]              | -0.0724                                | -0.1427                                | -0.0568                                | -0.1426                                | LB = EV and UB =1000                                 |
| Asp[ex]              | -0.013                                 | -0.0335                                | -0.0148                                | -0.0322                                | LB = EV and UB =1000                                 |
| Cys[ex]              | -                                      | -0.0045                                | -                                      | -0.0032                                | LB = EV and UB =1000                                 |
| Gln[ex]              | -0.0852                                | -0.2004                                | -0.0614                                | -0.1552                                | LB = EV and UB =1000                                 |
| Glu[ex]              | -0.0181                                | -0.053                                 | -0.0092                                | -0.0449                                | LB = EV and UB =1000                                 |
| Gly[ex]              | -0.0015                                | -0.0049                                | -0.0008                                | -0.0033                                | LB = EV and UB =1000                                 |
| His[ex]              | 0.0017                                 | 0.0007                                 | 0.0006                                 | 0.0007                                 | LB = EV and UB =1000                                 |
| Ile[ex]              | -0.0112                                | -0.0244                                | -0.0093                                | -0.0223                                | LB = EV and UB =1000                                 |
| Leu[ex]              | -0.0182                                | -0.0392                                | -0.0164                                | -0.0359                                | LB = EV and UB =1000                                 |
| Lys[ex]              | -0.0095                                | -0.017                                 | -0.0129                                | -0.0187                                | LB = EV and UB =1000                                 |
| Met[ex]              | -0.0087                                | -0.018                                 | -0.0077                                | -0.0168                                | LB = EV and UB =1000                                 |
| NH <sub>4</sub> [ex] | -0.0657                                | -0.5219                                | -0.0555                                | -0.494                                 | LB = EV and UB =1000                                 |
| Phe[ex]              | -0.0066                                | -0.0206                                | -0.005                                 | -0.0181                                | LB = EV and UB =1000                                 |
| Ser[ex]              | -0.0389                                | -0.0733                                | -0.0327                                | -0.0625                                | LB = EV and UB =1000                                 |
| Thr[ex]              | -0.0324                                | -0.0635                                | -0.0285                                | -0.0552                                | LB = EV and UB =1000                                 |
| Trp[ex]              | -0.0033                                | -0.0129                                | -0.0016                                | -0.0099                                | LB = EV and UB =1000                                 |
| Tyr[ex]              | -0.0003                                | -0.0051                                | -0.0006                                | -0.0025                                | LB = EV and UB =1000                                 |
| Val[ex]              | -0.0119                                | -0.0234                                | -0.0092                                | -0.0253                                | LB = EV and UB =1000                                 |
| Amyl alcohol[ex]     | 0.0024                                 | 0.0095                                 | 0.0021                                 | 0.0067                                 | 2) LB = 1000 and UB =1000<br>3) LB = 1000 and UB =EV |
| Isoamyl alcohol[ex]  | 0.0062                                 | 0.0242                                 | 0.0053                                 | 0.019                                  | 2) LB = 1000 and UB =1000<br>3) LB = 1000 and UB =EV |
| Propanol[ex]         | 0.0081                                 | 0.0248                                 | 0.0069                                 | 0.0253                                 | 2) LB = 1000 and UB =1000<br>3) LB = 1000 and UB =EV |

|                       |        |        |        |        |                                                      |
|-----------------------|--------|--------|--------|--------|------------------------------------------------------|
| Isobutanol[ex]        | 0.0024 | 0.0183 | 0.0025 | 0.0101 | 2) LB = 1000 and UB =1000<br>3) LB = 1000 and UB =EV |
| Phenyl<br>ethanol[ex] | 0.0009 | 0.0046 | 0.0009 | 0.0035 | 2) LB = 1000 and UB =1000<br>3) LB = 1000 and UB =EV |
| CO <sub>2</sub> [ex]  | 9.04   | 25.78  | 6.88   | 21.31  | 2) LB = 1000 and UB =1000<br>3) LB = 1000 and UB =EV |

The values in the constraint column correspond to the parts (e.g. 2) Validation of Model Predictions) of the results section. (Experimental Value = EV)
